# Supplementary material for: Chemical characterization of different gourmet table salts by atomic spectrometry and FT-Raman spectroscopy
Source: Royal Society of Chemistry journal article supplement (doi:10.1039/c8ay02201a), 2018-12-29
Supplement: c8ay02201a1.pdf [file c8ay02201a1.pdf]

## Supplementary Material

1. Figure S1 shows PC1 x PC3 biplot obtained after Principal Component Analysis and Figure S2 show the obtained dendrogram for data set.

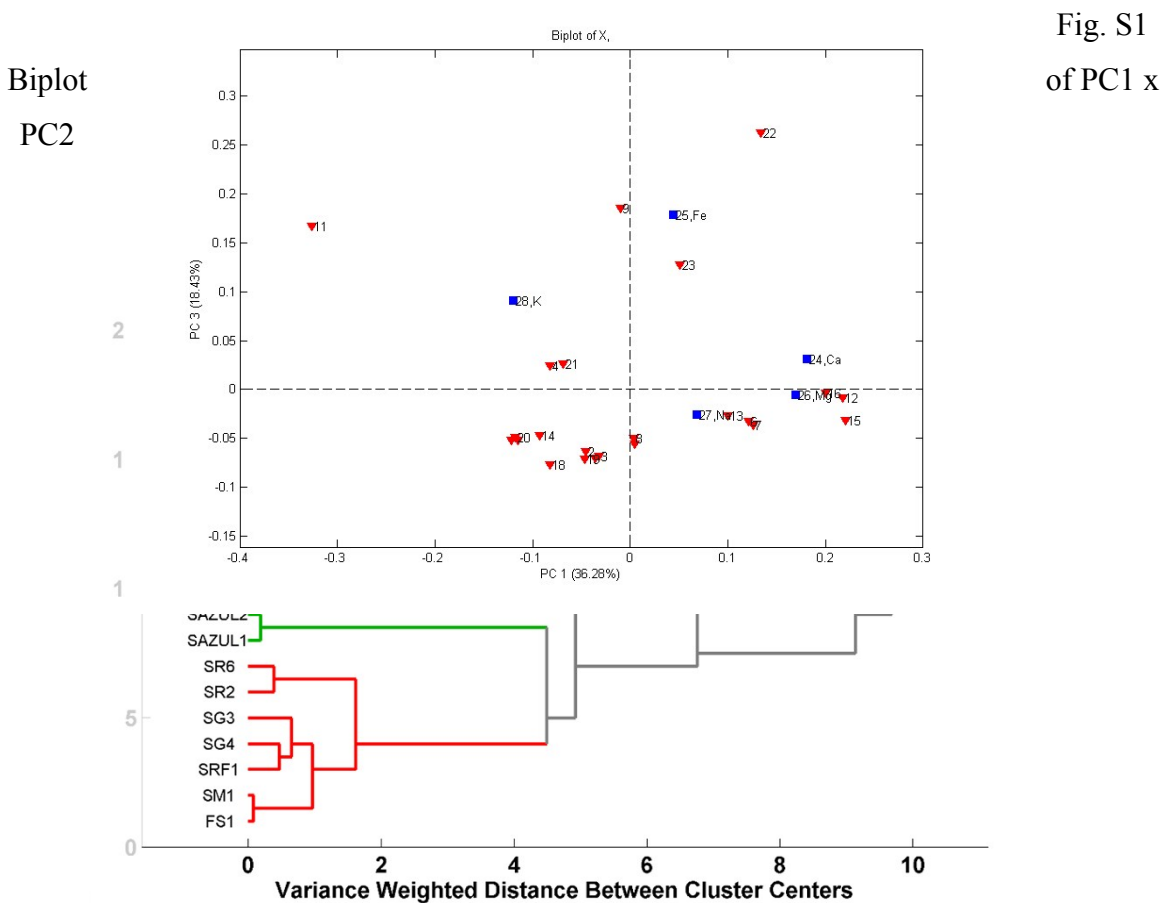

Fig. S2 Dendrogram of data set

2. Figures S3 e S4 show the electronic spectra of the food colorants E122 and E124,

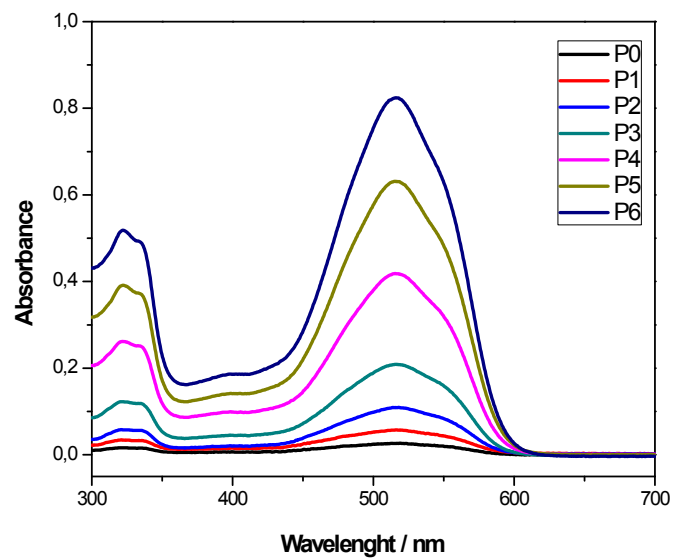

respectively. The solutions P0-P6 are the different standard solutions of the analytical curves.

Fig. S3 Electronic Spectra of E122 standard solutions

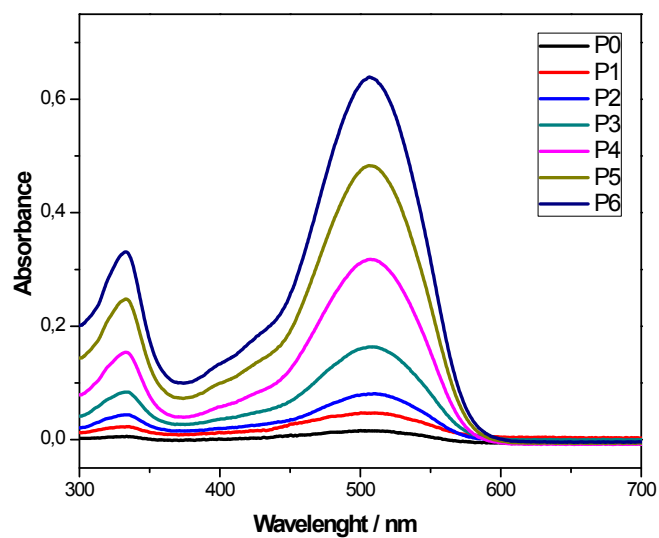

Fig. S4 Electronic Spectra of E124 standard solutions

3. Figures S5 and S6 show the electronic spectra of both AD11, AD12 and White table salt samples compared with the dyes spectra.

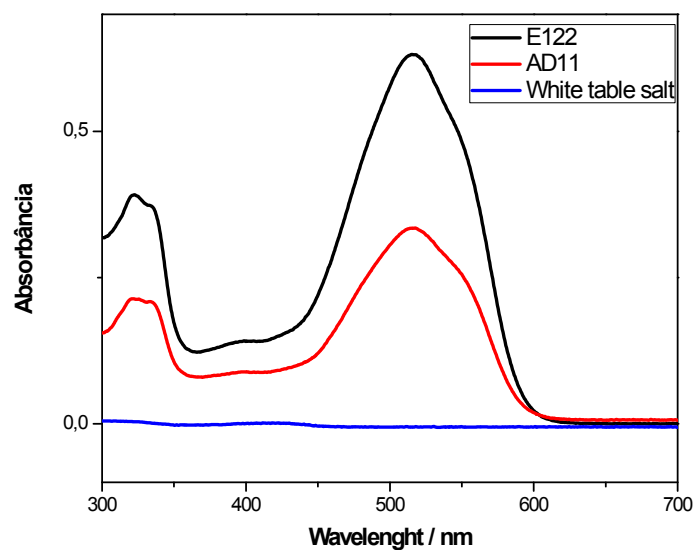

Fig. S5 Electronic Spectra of AD11, E122 and White table salt solutions

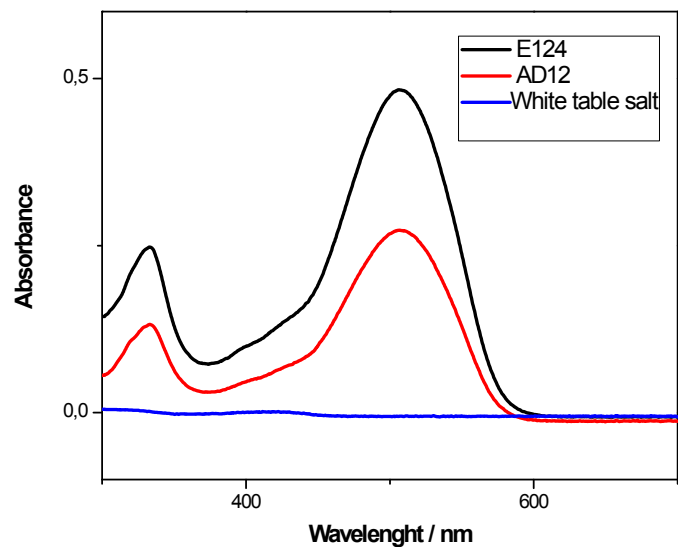

Fig. S6 Electronic Spectra of AD12, E124 and White table salt solutions

4. Figure S7 show the electronic spectra of the Himalayan salt samples analyzed in this work

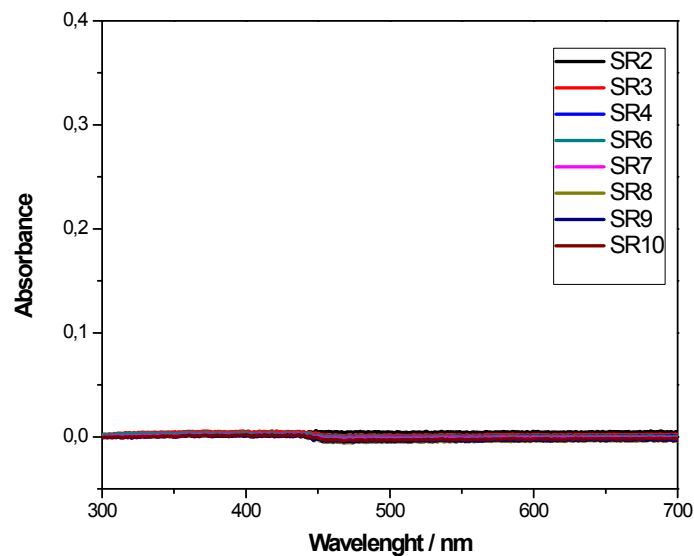

Fig. S7 Electronic Spectra of the Himalayan salt samples solution
